# Supplementary material
Source: publisher figshare collection journal article supplement (https://sage.figshare.com/ndownloader/files/20293629)
Supplement: Supplementary file 1 [file 20293629]

## Supplementary Materials – Data utilizing site assessment of occlusion locations

**Table 1: Baseline and Procedural Characteristics**

| Per Core Lab Assessment of M1/M2 Location |                      |                      |         | Per Site Assessment of M1/M2 Location |                      |                      |         |
|-------------------------------------------|----------------------|----------------------|---------|---------------------------------------|----------------------|----------------------|---------|
| Characteristic                            | M1 MCA<br>(N = 124)  | M2 MCA<br>(N = 37)   | P-value | Characteristic                        | M1 MCA<br>(N=139)    | M2 MCA<br>(N=22)     | P-value |
| Age, years                                |                      |                      |         | Age, years                            |                      |                      |         |
| N                                         | 124                  | 37                   |         | N                                     | 139                  | 22                   |         |
| Mean ± SD                                 | 71.18 ± 13.21        | 71.14 ± 11.18        |         | Mean ± SD                             | 70.88 ± 13.29        | 72.64 ± 8.45         |         |
| Median (IQR)                              | 74.00 (65.00, 80.00) | 73.00 (66.00, 78.00) | 0.625   | Median (IQR)                          | 73.00 (65.00, 80.00) | 74.00 (69.00, 78.00) | 0.996   |
| Range                                     | (27.00, 96.00)       | (36.00, 89.00)       |         | Range                                 | (27.00, 96.00)       | (53.00, 87.00)       |         |
| Age (< 80 years)                          | 68.5% (85/124)       | 78.4% (29/37)        | 0.306   | Age (< 80 years)                      | 69.8% (97/139)       | 77.3% (17/22)        | 0.616   |
| Female                                    | 59.7% (74/124)       | 59.5% (22/37)        | 1.000   | Female                                | 61.2% (85/139)       | 54.5% (12/22)        | 0.641   |
| Diabetes                                  | 17.7% (22/124)       | 32.4% (12/37)        | 0.067   | Diabetes                              | 18.7% (26/139)       | 36.4% (8/22)         | 0.088   |
| Atrial Fibrillation                       | 38.7% (48/124)       | 35.1% (13/37)        | 0.846   | Atrial Fibrillation                   | 37.8% (51/135)       | 47.6% (10/21)        | 0.473   |
| Hyperlipidemia                            | 34.7% (43/124)       | 37.8% (14/37)        | 0.692   | Hyperlipidemia                        | 36.3% (49/135)       | 33.3% (7/21)         | 1.000   |

|                                        |                |                |       |                                        |                 |                |       |
|----------------------------------------|----------------|----------------|-------|----------------------------------------|-----------------|----------------|-------|
| Systemic Hypertension                  | 73.4% (91/124) | 64.9% (24/37)  | 0.310 | Systemic Hypertension                  | 74.1% (103/139) | 59.1% (13/22)  | 0.199 |
| Angina/Coronary Artery Disease         | 5.6% (7/124)   | 10.8% (4/37)   | 0.280 | Angina/Coronary Artery Disease         | 5.1% (7/138)    | 18.2% (4/22)   | 0.047 |
| History of Smoking (Current or Former) | 24.0% (29/121) | 21.2% (7/33)   | 0.820 | History of Smoking (Current or Former) | 23.9% (32/134)  | 20.0% (4/20)   | 1.000 |
| Occlusion location (right)             | 51.6% (64/124) | 40.5% (15/37)  | 0.265 | Occlusion location (right)             | 49.6% (69/139)  | 40.9% (9/22)   | 0.497 |
| Pre-stroke Modified Rankin of 0        | 73.4% (91/124) | 83.8% (31/37)  | 0.195 | Pre-stroke Modified Rankin of 0        | 74.1% (103/139) | 81.8% (18/22)  | 0.598 |
| Baseline CT-ASPECT                     |                |                |       | Baseline CT-ASPECT                     |                 |                |       |
| N                                      | 103            | 34             | 0.984 | N                                      | 116             | 21             | 0.973 |
| Mean ± SD                              | 8.7 ± 1.2      | 8.7 ± 1.3      |       | Mean ± SD                              | 8.7 ± 1.2       | 8.7 ± 1.3      |       |
| Median (IQR)                           | 9.0 (8.0-10.0) | 9.0 (8.0-10.0) |       | Median (IQR)                           | 9.0 (8.0-10.0)  | 9.0 (8.0-10.0) |       |
| Range                                  | 6.0–10.0       | 6.0–10.0       |       | Range                                  | 6.0–10.0        | 6.0–10.0       |       |
| Baseline CT-ASPECT else                |                |                |       | Baseline CT-ASPECT else                |                 |                |       |
| MR DWI ASPECT                          |                |                |       | MR DWI ASPECT                          |                 |                |       |
| N                                      | 124            | 36             | 0.420 | N                                      | 139             | 21             | 0.908 |
| Mean ± SD                              | 8.8 ± 1.3      | 8.6 ± 1.4      |       | Mean ± SD                              | 8.8 ± 1.3       | 8.7 ± 1.3      |       |
| Median (IQR)                           | 9.0 (8.0-10.0) | 9.0 (7.0-10.0) |       | Median (IQR)                           | 9.0 (8.0-10.0)  | 9.0 (8.0-10.0) |       |
| Range                                  | 5.0–10.0       | 6.0–10.0       |       | Range                                  | 5.0–10.0        | 6.0–10.0       |       |

|                                    |                     |                     |       |                                    |                     |                    |       |
|------------------------------------|---------------------|---------------------|-------|------------------------------------|---------------------|--------------------|-------|
| Baseline NIHSS                     |                     |                     |       | Baseline NIHSS                     |                     |                    |       |
| N                                  | 124                 | 37                  |       | N                                  | 139                 | 22                 |       |
| Mean ± SD                          | 15.25 ± 5.60        | 15.25 ± 6.73        | 0.697 | Mean ± SD                          | 15.42 ± 5.90        | 13.73 ± 6.15       | 0.302 |
| Median (IQR)                       | 16.00 (10.50-20.00) | 16.00 (10.00-19.00) |       | Median (IQR)                       | 16.00 (10.00-20.00) | 16.00 (9.00-18.00) |       |
| Range                              | 2.00 – 24.00        | 3.00 – 36.00        |       | Range                              | 2.00 – 36.00        | 3.00 – 24.00       |       |
| NIHSS < 16                         | 49.2% (61/124)      | 45.9% (17/37)       |       | NIHSS < 16                         | 49.6 % (69/139)     | 45.5% (10/22)      |       |
| NIHSS 16-20                        | 30.6% (38/124)      | 32.4% (12/37)       | 0.749 | NIHSS 16-20                        | 28.8 % (40/139)     | 36.4% (8/22)       | 0.765 |
| NIHSS >20                          | 20.2% (25/124)      | 21.6% (8/37)        |       | NIHSS >20                          | 21.6 % (30/139)     | 18.2% (4/22)       |       |
| IV rt-PA prior to procedure        | 66.1% (82/124)      | 64.9% (24/37)       | 1.000 | IV rt-PA prior to procedure        | 67.6% (94/139)      | 54.5% (12/22)      | 0.236 |
| Catheters used for Penumbra System |                     |                     |       | Catheters used for Penumbra System |                     |                    |       |
| ACE68                              | 65.3% (81/124)      | 64.9% (24/37)       |       | ACE68                              | 61.9% (86/139)      | 77.3% (17/22)      |       |
| ACE64                              | 32.3% (40/124)      | 29.7% (11/37)       |       | ACE64                              | 34.5% (48/139)      | 18.2% (4/22)       |       |
| ACE60                              | 0.8% (1/124)        | 0%                  | 1.000 | ACE60                              | 0.7% (1/139)        | 0%                 | 0.153 |
| 3MAX                               | 0.8% (1/124)        | 0%                  |       | 3MAX                               | 0.7% (1/139)        | 0%                 |       |
| 5MAX with Stent Retriever          | 0%                  | 2.7% (1/37)         |       | 5MAX with Stent Retriever          | 0%                  | 4.5% (1/22)        |       |
| ACE64 with Stent Retriever         | 0.8% (1/124)        | 0%                  |       | ACE64 with Stent Retriever         | 0.7% (1/139)        | 0%                 |       |
| ACE68 with Stent Retriever         | 0%                  | 2.7% (1/37)         |       | ACE68 with Stent Retriever         | 1.4% (2/139)        | 0%                 |       |

|                                                     |                        |                            |       |                                                     |                        |                            |       |
|-----------------------------------------------------|------------------------|----------------------------|-------|-----------------------------------------------------|------------------------|----------------------------|-------|
| Time from symptom onset to hospital admission (min) |                        |                            |       | Time from symptom onset to hospital admission (min) |                        |                            |       |
| N                                                   | 124                    | 37                         |       | N                                                   | 139                    | 22                         |       |
| Mean ± SD                                           | 116.63 ± 80.51         | 133.57 ± 85.62             | 0.207 | Mean ± SD                                           | 118.01 ± 81.67         | 123.59 ± 85.61             | 0.633 |
| Median (IQR)                                        | 91.50 (56.00-159.50)   | 125.00 (73.00-177.00)      |       | Median (IQR)                                        | 95.00 (57.00-168.00)   | 122.50 (71.00-152.00)      |       |
| Range                                               | 0.00 – 351.00          | 0.00 – 340.00              |       | Range                                               | 0.00 – 351.00          | 0.00 – 313.00              |       |
| Time from Onset to Admission ≤ 3 hours              | 79.8% (99/124)         | 75.7% (28/37)              | 0.647 | Time from Onset to Admission ≤ 3 hours              | 79.1% (110/139)        | 77.3% (17/22)              | 0.785 |
| Time from symptom onset to final angiogram (min)    |                        |                            |       | Time from symptom onset to final angiogram (min)    |                        |                            |       |
| N                                                   | 124                    | 37                         |       | N                                                   | 139                    | 22                         |       |
| Mean ± SD                                           | 255.77 ± 90.67         | 269.49 ± 87.62             | 0.184 | Mean ± SD                                           | 256.40 ± 89.57         | 263.95 ± 95.75             | 0.241 |
| Median (IQR)                                        | 250.50 (194.50-317.00) | 266.00 (234.00-317.00)     |       | Median (IQR)                                        | 250.00 (194.00-315.00) | 277.50 (225.00-327.00)     |       |
| Range                                               | 5.00 – 507.00          | 14.00 – 425.00             |       | Range                                               | 5.00 – 507.00          | 14.00 – 395.00             |       |
| Frontline ACE68/64 catheter passes                  |                        |                            |       | Frontline ACE68/64 catheter passes                  |                        |                            |       |
| Mean ± SD                                           | 1.52 ± 0.85            | 1.22 ± 0.59                | 0.049 | Mean ± SD                                           | 1.52 ± 0.83            | 1.05 ± 0.38                | 0.009 |
| Median (IQR)                                        | 1.00 (1.00 - 2.00)     | 1.00 (1.00 – 1.00)         |       | Median (IQR)                                        | 1.00 (1.00 - 2.00)     | 1.00 (1.00 – 1.00)         |       |
| Range                                               | 1.00 – 5.00            | 0.00 <sup>[1]</sup> – 3.00 |       | Range                                               | 1.00 – 5.00            | 0.00 <sup>[1]</sup> – 2.00 |       |

*IQR, interquartile range; NIHSS, National Institutes of Health Stroke Scale; mRS, modified Rankin Scale.*

*P-values for categorical variables are based on Fisher's test. P-values for numerical variables are based on independent T-test else Mann-Whitney U test based on normality of the data.*

*[1] One patient with failure to access*

*IQR, interquartile range; NIHSS, National Institutes of Health Stroke Scale; mRS, modified Rankin Scale.*

*P-values for categorical variables are based on Fisher's test. P-values for numerical variables are based on independent T-test else Mann-Whitney U test based on normality of the data.*

*[1] One patient with failure to access*

**Table 2: Safety and Efficacy Outcomes**

| Per Core Lab Assessment of M1/M2 Location                        |                              |                            |         | Per Site Assessment of M1/M2 Location                            |                              |                  |         |
|------------------------------------------------------------------|------------------------------|----------------------------|---------|------------------------------------------------------------------|------------------------------|------------------|---------|
| Outcome                                                          | M1 MCA, % (n/N)              | M2 MCA, % (n/N)            | P-value | Outcome                                                          | M1 MCA<br>(N=139)            | M2 MCA<br>(N=22) | P-value |
| mTICI 2b-3 Post-Penumbra System aspiration: per core laboratory* | 69.4% (86/124)               | 67.6% (25/37)              | 0.842   | mTICI 2b-3 Post-Penumbra System aspiration: per core laboratory* | 67.6% (94/139)               | 77.3% (17/22)    | 0.461   |
| Treated with stent retriever post-Penumbra System (rescue)       | 22.6% (28/124)               | 21.6% (8/37)               | 1.000   | Treated with stent retriever post-Penumbra System (rescue)       | 23.0% (32/139)               | 18.2% (4/22)     | 0.786   |
| - mTICI 2b-3 post-Stent Retriever after Penumbra System (rescue) | 82.1% (23/28)                | 87.5% (7/8)                | 1.000   | - mTICI 2b-3 post-Stent Retriever after Penumbra System (rescue) | 81.3% (26/32)                | 100% (4/4)       | 1.000   |
| mTICI 2b-3 at post procedure: per core laboratory*               | 92.7% (115/124) <sup>δ</sup> | 91.9% (34/37) <sup>ϕ</sup> | 1.000   | mTICI 2b-3 at post procedure: per core laboratory*               | 92.1% (128/139) <sup>δ</sup> | 95.5% (21/22)    | 1.000   |
| mRS 0-2 at 90 days†                                              | 57.0% (69/121)               | 70.3% (26/37)              | 0.181   | mRS 0-2 at 90 days†                                              | 58.1% (79/136)               | 68.2% (15/22)    | 0.484   |

|                                                            |                     |                     |       |                                                            |                     |                     |       |
|------------------------------------------------------------|---------------------|---------------------|-------|------------------------------------------------------------|---------------------|---------------------|-------|
| Device-related SAEs at 24 hours: per CEC                   | 1.6% (2/124)        | 0.0%                | 1.000 | Device-related SAEs at 24 hours: per CEC                   | 1.4% (2/139)        | 0.0%                | 1.000 |
| Device and procedure-related SAEs at 24 hours: per CEC     | 3.2% (4/124)        | 5.4% (2/37)         | 0.622 | Device and procedure-related SAEs at 24 hours: per CEC     | 3.6% (5/139)        | 4.5% (1/22)         | 0.592 |
| Device and procedure-related SAEs at 30 days: per CEC      | 4.0% (5/124)        | 8.1% (3/37)         | 0.386 | Device and procedure-related SAEs at 30 days: per CEC      | 5.0% (7/139)        | 4.5% (1/22)         | 1.000 |
| All-cause mortality at 90 days‡                            | 6.6% (8/121)        | 2.7% (1/37)         | 0.686 | All-cause mortality at 90 days‡                            | 5.8% (8/139)        | 4.5% (1/22)         | 1.000 |
| Symptomatic intracranial hemorrhage at 24 hours: per CEC § | 1.6% (2/124)        | 2.7% (1/37)         | 0.546 | Symptomatic intracranial hemorrhage at 24 hours: per CEC § | 2.2% (3/139)        | 0.0%                | 1.000 |
| Time from arterial puncture to revascularization (min)     |                     |                     |       | Time from arterial puncture to revascularization (min)     |                     |                     |       |
| N                                                          | 124                 | 37                  |       | N                                                          | 139                 | 22                  |       |
| Mean ± SD                                                  | 38.93 ± 26.89       | 36.68 ± 26.94       | 0.497 | Mean ± SD                                                  | 38.36 ± 26.70       | 37.50 ± 29.40       | 0.694 |
| Median (IQR)                                               | 31.00 (20.00-46.50) | 25.00 (20.00-49.00) |       | Median (IQR)                                               | 31.00 (20.00-47.00) | 25.00 (20.00-50.00) |       |
| Range                                                      | 4.00 – 130.00       | 3.00 – 135.00       |       | Range                                                      | 3.00 – 130.00       | 7.00 – 135.00       |       |

|                                                                                                                                                                                                                                                                                                                                                                                                                                                                                                                                                                                                                                                                                                          |                        |                        |       |                                                                                                                                                                                                                                                                                                                                                                                                                                                                                                                                                                                                                                                                                                            |                        |                        |       |
|----------------------------------------------------------------------------------------------------------------------------------------------------------------------------------------------------------------------------------------------------------------------------------------------------------------------------------------------------------------------------------------------------------------------------------------------------------------------------------------------------------------------------------------------------------------------------------------------------------------------------------------------------------------------------------------------------------|------------------------|------------------------|-------|------------------------------------------------------------------------------------------------------------------------------------------------------------------------------------------------------------------------------------------------------------------------------------------------------------------------------------------------------------------------------------------------------------------------------------------------------------------------------------------------------------------------------------------------------------------------------------------------------------------------------------------------------------------------------------------------------------|------------------------|------------------------|-------|
| Time from arterial puncture to revascularization $\leq$ 1 hour                                                                                                                                                                                                                                                                                                                                                                                                                                                                                                                                                                                                                                           | 82.3% (102/124)        | 83.8% (31/37)          | 1.000 | Time from arterial puncture to revascularization $\leq$ 1 hour                                                                                                                                                                                                                                                                                                                                                                                                                                                                                                                                                                                                                                             | 82.7% (115/139)        | 81.8% (18/22)          | 1.000 |
| Time from symptom onset to revascularization (min)                                                                                                                                                                                                                                                                                                                                                                                                                                                                                                                                                                                                                                                       |                        |                        |       | Time from symptom onset to revascularization (min)                                                                                                                                                                                                                                                                                                                                                                                                                                                                                                                                                                                                                                                         |                        |                        |       |
| N                                                                                                                                                                                                                                                                                                                                                                                                                                                                                                                                                                                                                                                                                                        | 124                    | 37                     |       | N                                                                                                                                                                                                                                                                                                                                                                                                                                                                                                                                                                                                                                                                                                          | 139                    | 22                     |       |
| Mean $\pm$ SD                                                                                                                                                                                                                                                                                                                                                                                                                                                                                                                                                                                                                                                                                            | 246.66 $\pm$ 86.48     | 260.65 $\pm$ 84.94     | 0.201 | Mean $\pm$ SD                                                                                                                                                                                                                                                                                                                                                                                                                                                                                                                                                                                                                                                                                              | 247.40 $\pm$ 85.74     | 257.45 $\pm$ 93.77     | 0.231 |
| Median (IQR)                                                                                                                                                                                                                                                                                                                                                                                                                                                                                                                                                                                                                                                                                             | 243.00 (185.00-307.00) | 260.00 (227.00-304.00) |       | Median (IQR)                                                                                                                                                                                                                                                                                                                                                                                                                                                                                                                                                                                                                                                                                               | 244.00 (185.00-304.00) | 270.50 (215.00-324.00) |       |
| Range                                                                                                                                                                                                                                                                                                                                                                                                                                                                                                                                                                                                                                                                                                    | 5.00 – 480.00          | 14.00 – 425.00         |       | Range                                                                                                                                                                                                                                                                                                                                                                                                                                                                                                                                                                                                                                                                                                      | 5.00 – 480.0           | 14.00 – 385.00         |       |
| <p>CEC, Clinical Events Committee; CI, confidence interval; IQR, interquartile range; mRS, modified Rankin Scale; mTICI, modified Thrombolysis in Cerebral Infarction; SAE, serious adverse event.</p> <p>P-values for categorical variables are based on Fisher's test. P-values for numerical variables are based on independent T-test else Mann-Whitney U test based on normality of the data.</p> <p>* For 2 patients missing Core Lab DSA review due to vessel not visualized, PI assessment of mTICI score carried over.</p> <p>δ Three subjects revascularized at final angiogram, post-PS without further intervention, 3 subjects revascularized post-PS with further intervention (1 with</p> |                        |                        |       | <p>CEC, Clinical Events Committee; CI, confidence interval; IQR, interquartile range; mRS, modified Rankin Scale; mTICI, modified Thrombolysis in Cerebral Infarction; SAE, serious adverse event.</p> <p>P-values for categorical variables are based on Fisher's test. P-values for numerical variables are based on independent T-test else Mann-Whitney U test based on normality of the data.</p> <p>* For 2 patients missing Core Lab DSA review due to vessel not visualized, PI assessment of mTICI score carried over.</p> <p>δ Five subjects revascularized at final angiogram, post-PS without further intervention, 3 subjects revascularized post-PS with further intervention (1 subject</p> |                        |                        |       |



|                                                                                                                                                                                                                                                                                                                                                                                                                                                                                                                                                                                                           |                                                                                                                                                                                                                                                                                                                                                                                                                                                                                                                                 |
|-----------------------------------------------------------------------------------------------------------------------------------------------------------------------------------------------------------------------------------------------------------------------------------------------------------------------------------------------------------------------------------------------------------------------------------------------------------------------------------------------------------------------------------------------------------------------------------------------------------|---------------------------------------------------------------------------------------------------------------------------------------------------------------------------------------------------------------------------------------------------------------------------------------------------------------------------------------------------------------------------------------------------------------------------------------------------------------------------------------------------------------------------------|
| <p><i>stent post-PS, 1 with SOFIA plus post-PS, 1 with microcatheter guidewire disruption post-PS)</i></p> <p><i>φ Two subjects revascularized at final angiogram post-PS without further intervention</i></p> <p><i>† Four patients withdrew prior to the 90-day follow up and were excluded from 90-day mRS analysis.</i></p> <p><i>‡ Mortality assigned as 90-day mRS 6.</i></p> <p><i>§ Defined as 24-hour CT evidence of an ECASS-defined intracranial hemorrhage associated with a 4-point or more worsening of the NIHSS score.</i></p> <p><i>// Time to mTICI 2b-3, else final angiogram.</i></p> | <p><i>with stent treatment post-PS, 1 subject SOFIA plus post-PS, 1 subject with microcatheter guidewire disruption post-PS)</i></p> <p><i>† Four patients withdrew prior to the 90-day follow up and were excluded from 90-day mRS analysis.</i></p> <p><i>‡ Mortality assigned as 90-day mRS 6.</i></p> <p><i>§ Defined as 24-hour CT evidence of an ECASS-defined intracranial hemorrhage associated with a 4-point or more worsening of the NIHSS score.</i></p> <p><i>// Time to mTICI 2b-3, else final angiogram.</i></p> |
|-----------------------------------------------------------------------------------------------------------------------------------------------------------------------------------------------------------------------------------------------------------------------------------------------------------------------------------------------------------------------------------------------------------------------------------------------------------------------------------------------------------------------------------------------------------------------------------------------------------|---------------------------------------------------------------------------------------------------------------------------------------------------------------------------------------------------------------------------------------------------------------------------------------------------------------------------------------------------------------------------------------------------------------------------------------------------------------------------------------------------------------------------------|

**Table 3: Analyses for 90 day mRS 0-2**

| Per Core Lab Assessment of M1/M2 Location                                                                                                                                                                                                             |            |               |         | Per Site Assessment of M1/M2 Location                                                                                                                                                                                                                 |            |               |         |
|-------------------------------------------------------------------------------------------------------------------------------------------------------------------------------------------------------------------------------------------------------|------------|---------------|---------|-------------------------------------------------------------------------------------------------------------------------------------------------------------------------------------------------------------------------------------------------------|------------|---------------|---------|
| Univariable Analysis                                                                                                                                                                                                                                  |            |               |         | Univariable Analysis                                                                                                                                                                                                                                  |            |               |         |
| Variable                                                                                                                                                                                                                                              | Odds Ratio | 95% CI        | P-value | Variable                                                                                                                                                                                                                                              | Odds Ratio | 95% CI        | P-value |
| M1 Location (vs. M2)                                                                                                                                                                                                                                  | 0.56       | (0.25, 1.24)  | 0.153   | M1 Location (vs. M2)                                                                                                                                                                                                                                  | 0.65       | (0.25, 1.69)  | 0.374   |
| Occlusion Location Left (vs. Right)                                                                                                                                                                                                                   | 0.77       | (0.41, 1.45)  | 0.417   | Occlusion Location Left (vs. Right)                                                                                                                                                                                                                   | 0.76       | (0.40, 1.44)  | 0.401   |
| Age (<80 years)                                                                                                                                                                                                                                       | 4.49       | (2.16, 9.31)  | <0.001  | Age (<80 years)                                                                                                                                                                                                                                       | 4.30       | (2.08, 8.91)  | <0.001  |
| Gender (Female)                                                                                                                                                                                                                                       | 0.58       | (0.30, 1.12)  | 0.106   | Gender (Female)                                                                                                                                                                                                                                       | 0.58       | (0.30, 1.12)  | 0.105   |
| Pre-Stroke Modified Rankin =0                                                                                                                                                                                                                         | 3.56       | (1.66, 7.63)  | <0.001  | Pre-Stroke Modified Rankin =0                                                                                                                                                                                                                         | 3.66       | (1.72, 7.82)  | <0.001  |
| NIHSS < 16<br>(vs. NIHSS >20)                                                                                                                                                                                                                         | 6.13       | (2.50, 15.02) | <0.001  | NIHSS < 16<br>(vs. NIHSS >20)                                                                                                                                                                                                                         | 6.51       | (2.67, 15.89) | <0.001  |
| NIHSS ≥16, ≤20<br>(vs. NIHSS >20)                                                                                                                                                                                                                     | 3.51       | (1.37, 9.00)  | 0.350   | NIHSS ≥16, ≤20<br>(vs. NIHSS >20)                                                                                                                                                                                                                     | 3.41       | (1.33, 8.75)  | 0.441   |
| History of Smoking (Current or Former)                                                                                                                                                                                                                | 1.96       | (0.86, 4.45)  | 0.107   | History of Smoking (Current or Former)                                                                                                                                                                                                                | 2.03       | (0.90, 4.61)  | 0.090   |
| History of Systemic Hypertension                                                                                                                                                                                                                      | 0.51       | (0.24, 1.08)  | 0.078   | History of Systemic Hypertension                                                                                                                                                                                                                      | 0.52       | (0.25, 1.09)  | 0.084   |
| IV tPA Administration                                                                                                                                                                                                                                 | 2.26       | (1.16, 4.42)  | 0.017   | IV tPA Administration                                                                                                                                                                                                                                 | 2.44       | (1.24, 4.76)  | 0.009   |
| Time from Onset to Admission = < 3 hours                                                                                                                                                                                                              | 2.30       | (1.07, 4.98)  | 0.034   | Time from Onset to Admission = < 3 hours                                                                                                                                                                                                              | 2.22       | (1.03, 4.80)  | 0.042   |
| Time from Puncture to Revascularization* = < 1 hour                                                                                                                                                                                                   | 1.97       | (0.87, 4.49)  | 0.106   | Time from Puncture to Revascularization* = < 1 hour                                                                                                                                                                                                   | 1.91       | (0.84, 4.34)  | 0.124   |
| Multivariable Analysis                                                                                                                                                                                                                                |            |               |         | Multivariable Analysis                                                                                                                                                                                                                                |            |               |         |
| Variable                                                                                                                                                                                                                                              | Odds Ratio | 95% CI        | P-value | Variable                                                                                                                                                                                                                                              | Odds Ratio | 95% CI        | P-value |
| M1 Location (vs. M2)                                                                                                                                                                                                                                  | 0.59       | (0.22, 1.62)  | 0.307   | M1 Location (vs. M2)                                                                                                                                                                                                                                  | 0.66       | (0.19, 2.31)  | 0.510   |
| Age (<80 years)                                                                                                                                                                                                                                       | 6.45       | (2.70, 15.43) | <0.001  | Age (<80 years)                                                                                                                                                                                                                                       | 6.40       | (2.67, 15.37) | <0.001  |
| NIHSS < 16<br>(vs. NIHSS >20)                                                                                                                                                                                                                         | 8.65       | (3.07, 24.35) | 0.003   | NIHSS < 16<br>(vs. NIHSS >20)                                                                                                                                                                                                                         | 9.27       | (3.33, 25.82) | 0.001   |
| NIHSS => 16, =<20<br>(vs. NIHSS >20)                                                                                                                                                                                                                  | 6.79       | (2.20, 20.93) | 0.058   | NIHSS => 16, =<20<br>(vs. NIHSS >20)                                                                                                                                                                                                                  | 6.90       | (2.23, 21.38) | 0.067   |
| Time from Onset to Admission = < 3 hours                                                                                                                                                                                                              | 3.61       | (1.40, 9.32)  | 0.008   | Time from Onset to Admission = < 3 hours                                                                                                                                                                                                              | 3.39       | (1.32, 8.68)  | 0.011   |
| <i>mRS, modified Rankin Scale; NIHSS, National Institutes of Health Stroke Scale. Four patients withdrew prior to the 90-day follow up and were excluded from 90-day mRS analysis. Variables with univariable p-value &lt; 0.20 were included for</i> |            |               |         | <i>mRS, modified Rankin Scale; NIHSS, National Institutes of Health Stroke Scale. Four patients withdrew prior to the 90-day follow up and were excluded from 90-day mRS analysis. Variables with univariable p-value &lt; 0.20 were included for</i> |            |               |         |

*multivariable predictor analysis. Stepwise selection process was used for variables, with alpha-to-remove criterion of 0.05.*  
*\*Time to mTICI 2b-3, else final angiogram.*

*multivariable predictor analysis. Stepwise selection process was used for variables, with alpha-to-remove criterion of 0.05.*  
*\*Time to mTICI 2b-3, else final angiogram.*

**Table 4: Analyses for mTICI2b-3 Post Procedure**

| Per Core Lab Assessment of M1/M2 Location                                                                                                                                                                                                                                                                                                                                                                                                                                             |            |               |         | Per Site Assessment of M1/M2 Location                                                                                                                                                                                                                                                                                                                                                                                                                                                 |            |               |         |
|---------------------------------------------------------------------------------------------------------------------------------------------------------------------------------------------------------------------------------------------------------------------------------------------------------------------------------------------------------------------------------------------------------------------------------------------------------------------------------------|------------|---------------|---------|---------------------------------------------------------------------------------------------------------------------------------------------------------------------------------------------------------------------------------------------------------------------------------------------------------------------------------------------------------------------------------------------------------------------------------------------------------------------------------------|------------|---------------|---------|
| Univariable Analysis                                                                                                                                                                                                                                                                                                                                                                                                                                                                  |            |               |         | Univariable Analysis                                                                                                                                                                                                                                                                                                                                                                                                                                                                  |            |               |         |
| Variable                                                                                                                                                                                                                                                                                                                                                                                                                                                                              | Odds Ratio | 95% CI        | P-value | Variable                                                                                                                                                                                                                                                                                                                                                                                                                                                                              | Odds Ratio | 95% CI        | P-value |
| M1 Location (vs. M2)                                                                                                                                                                                                                                                                                                                                                                                                                                                                  | 1.13       | (0.29, 4.40)  | 0.863   | M1 Location (vs. M2)                                                                                                                                                                                                                                                                                                                                                                                                                                                                  | 0.55       | (0.07, 4.52)  | 0.581   |
| Occlusion Location Left (vs. Right)                                                                                                                                                                                                                                                                                                                                                                                                                                                   | 1.04       | (0.32, 3.38)  | 0.947   | Occlusion Location Left (vs. Right)                                                                                                                                                                                                                                                                                                                                                                                                                                                   | 1.07       | (0.33, 3.47)  | 0.911   |
| Age (<80 years)                                                                                                                                                                                                                                                                                                                                                                                                                                                                       | 0.46       | (0.10, 2.20)  | 0.332   | Age (<80 years)                                                                                                                                                                                                                                                                                                                                                                                                                                                                       | 0.46       | (0.10, 2.20)  | 0.331   |
| Gender (Female)                                                                                                                                                                                                                                                                                                                                                                                                                                                                       | 4.53       | (0.47, 4.96)  | 0.482   | Gender (Female)                                                                                                                                                                                                                                                                                                                                                                                                                                                                       | 1.57       | (0.48, 5.10)  | 0.454   |
| Pre-Stroke Modified Rankin =0                                                                                                                                                                                                                                                                                                                                                                                                                                                         | 1.05       | (0.27, 4.07)  | 0.948   | Pre-Stroke Modified Rankin =0                                                                                                                                                                                                                                                                                                                                                                                                                                                         | 1.01       | (0.26, 3.93)  | 0.990   |
| NIHSS < 16<br>(vs. NIHSS >20)                                                                                                                                                                                                                                                                                                                                                                                                                                                         | 1.46       | (0.33, 6.50)  | 0.614   | NIHSS < 16<br>(vs. NIHSS >20)                                                                                                                                                                                                                                                                                                                                                                                                                                                         | 1.43       | (0.32, 6.36)  | 0.591   |
| NIHSS ≥16, ≤20<br>(vs. NIHSS >20)                                                                                                                                                                                                                                                                                                                                                                                                                                                     | 1.15       | (0.24, 5.51)  | 0.939   | NIHSS ≥16, ≤20<br>(vs. NIHSS >20)                                                                                                                                                                                                                                                                                                                                                                                                                                                     | 1.07       | (0.22, 5.10)  | 0.856   |
| History of Systemic Hypertension                                                                                                                                                                                                                                                                                                                                                                                                                                                      | 1.88       | (0.57, 6.26)  | 0.303   | History of Systemic Hypertension                                                                                                                                                                                                                                                                                                                                                                                                                                                      | 1.95       | (0.58, 6.49)  | 0.278   |
| IV tPA Administration                                                                                                                                                                                                                                                                                                                                                                                                                                                                 | 0.96       | (0.28, 3.34)  | 0.950   | IV tPA Administration                                                                                                                                                                                                                                                                                                                                                                                                                                                                 | 0.96       | (0.28, 3.34)  | 0.950   |
| Time from Onset to Admission = < 3<br>hours                                                                                                                                                                                                                                                                                                                                                                                                                                           | 1.98       | (0.56, 7.03)  | 0.288   | Time from Onset to Admission = <<br>3 hours                                                                                                                                                                                                                                                                                                                                                                                                                                           | 1.98       | (0.56, 7.03)  | 0.289   |
| Time from Puncture to<br>Revascularization* = < 1 hour                                                                                                                                                                                                                                                                                                                                                                                                                                | 3.91       | (1.14, 13.34) | 0.030   | Time from Puncture to<br>Revascularization* = < 1 hour                                                                                                                                                                                                                                                                                                                                                                                                                                | 3.91       | (1.14, 13.40) | 0.030   |
| Multivariable Analysis                                                                                                                                                                                                                                                                                                                                                                                                                                                                |            |               |         | Multivariable Analysis                                                                                                                                                                                                                                                                                                                                                                                                                                                                |            |               |         |
| Variable                                                                                                                                                                                                                                                                                                                                                                                                                                                                              | Odds Ratio | 95% CI        | P-value | Variable                                                                                                                                                                                                                                                                                                                                                                                                                                                                              | Odds Ratio | 95% CI        | P-value |
| M1 Location (vs. M2)                                                                                                                                                                                                                                                                                                                                                                                                                                                                  | 1.43       | (0.35, 5.92)  | 0.619   | M1 Location (vs. M2)                                                                                                                                                                                                                                                                                                                                                                                                                                                                  | 0.62       | (0.07, 5.26)  | 0.658   |
| Time from Puncture to<br>Revascularization* = < 1 hour                                                                                                                                                                                                                                                                                                                                                                                                                                | 4.36       | (1.23, 15.53) | 0.023   | Time from Puncture to<br>Revascularization* = < 1 hour                                                                                                                                                                                                                                                                                                                                                                                                                                | 4.39       | (1.23, 15.63) | 0.023   |
| <i>mTICI, modified Thrombolysis in Cerebral Infarction; NIHSS, National Institutes of Health Stroke Scale.<br/>For 2 patients missing Core Lab DSA review due to vessel not visualized, PI assessment of<br/>mTICI score carried over. Variables with univariable p-value &lt; 0.20 were included for multivariable predictor analysis. Stepwise selection process was used for variables, with alpha-to-remove criterion of 0.05.<br/>*Time to mTICI 2b-3, else final angiogram.</i> |            |               |         | <i>mTICI, modified Thrombolysis in Cerebral Infarction; NIHSS, National Institutes of Health Stroke Scale.<br/>For 2 patients missing Core Lab DSA review due to vessel not visualized, PI assessment of<br/>mTICI score carried over. Variables with univariable p-value &lt; 0.20 were included for multivariable predictor analysis. Stepwise selection process was used for variables, with alpha-to-remove criterion of 0.05.<br/>*Time to mTICI 2b-3, else final angiogram.</i> |            |               |         |
